# Supplementary material for: Experimental and Numerical Study of Downward Flame Spread over Glass-Fiber-Reinforced Epoxy Resin
Source: MDPI journal article supplement (doi:10.3390/polym14050911), 2022-02-24
Supplement: s1 [file s1]

## Supplemental Materials

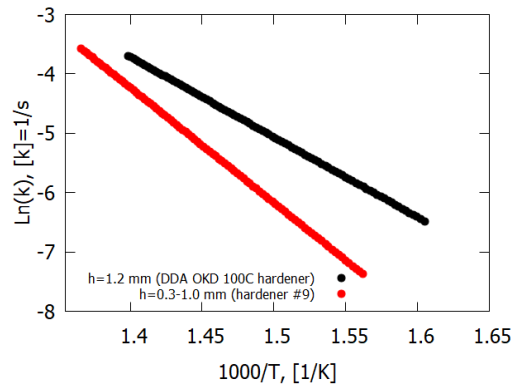

**Figure S1.** The GFRER pyrolysis rate constant with different curing agent types in the Arrhenius plot.

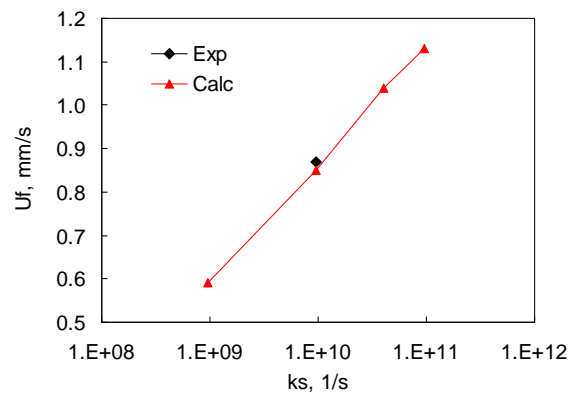

**Figure S2.** The effect of the pre-exponential factor of the pyrolysis reaction on the flame spread rate. Black – experiment, red – calculation.
